# Supplementary material for: Age-Related Changes in the Gut Microbiota Modify Brain Lipid Composition
Source: PubMed Central journal article supplement (PMC6970973; doi:10.3389/fcimb.2019.00444), 2020-01-14
Supplement: Data_Sheet_1.pdf [file Data_Sheet_1.pdf]

**Supplementary Table 1: Primers**

| <b>Genes</b>   | <b>Forward primers (5'-3')</b> | <b>Reverse primers (5'-3')</b> |
|----------------|--------------------------------|--------------------------------|
| <i>Acat1</i>   | CATCCAAGGGGGTGAAGGAC           | CTGCCACCATCACATCCTGA           |
| <i>Acat2</i>   | CAAGGAGATTGTGCCAGTGC           | CGTTCATTCTGATGCGTTCG           |
| <i>Hmgcs1</i>  | CTGCAGTCTTCAATGCCGTG           | AGGTCTGGCATTTCCTGTGG           |
| <i>Hmgcr</i>   | CATGACATTCTTCCCGGCCT           | ATCCAGCGACTATGAGCGTG           |
| <i>Plpp1</i>   | CGGCAATCCCTACATAGCCA           | AGATAGCCAAGAAGTGCGGC           |
| <i>Plpp2</i>   | TGAGGCCCACTGTTCAGTTC           | AAACATAGCGGACCGTGAGG           |
| <i>Plpp3</i>   | ATTTTCATGTGAGGGCCAGGG          | TCTCTGATCCCAAGGAGCCA           |
| <i>Dgat2</i>   | CCAAGAAAGGTGGCAGGAGAT          | TGGTCAGCAGGTTGTGTGTC           |
| <i>Fasn</i>    | GACTCGGCTACTGACACGAC           | CGAGTTGAGCTGGGTTAGGG           |
| <i>Scd1</i>    | CAGGAGGGCAGGTTTCCAAG           | CGTTCATTTCCGGAGGGAGG           |
| <i>Fads1</i>   | CGCCAAACGCGCTACTTTAC           | CCACAAAAGGATCCGTGGCA           |
| <i>Fads2</i>   | CGTGGGCAAGTTCTTGAAGC           | TCTGAGAGCTTTTGCCACGG           |
| <i>Elovl2</i>  | GTGATGTCCGGGTAGCCAAG           | GGACGCGTGGTGATAGACAT           |
| <i>Elovl5</i>  | TGATGAACTGGGTTCCCTGC           | CAGCTGCCCTTGAGTGATGT           |
| <i>Srebp1c</i> | GGAGCCATGGATTGCACATT           | GCTTCCAGAGAGGAGGCCAG           |
| <i>Srebp2</i>  | GCGATGGATGAGAGCAGCG            | GTTGCCACTGCCACCATTG            |
| <i>Hprt</i>    | CAGTCCCAGCGTCGTGATTA           | TGGCCTCCCATCTCCTTCAT           |

**Supplementary Table 2: Relative amounts of ester-linked fatty acids in the cortex.**

| <b>Fatty acids</b>                 | <b>+ Microb YM (n=7)</b> | <b>+ Microb OM (n=8)</b> |
|------------------------------------|--------------------------|--------------------------|
| <b>Saturated fatty acids</b>       |                          |                          |
| C14:0                              | 0.090±0.002              | 0.091±0.002              |
| C15:0                              | 0.064±0.003              | 0.066±0.002              |
| C16:0                              | 23.741±0.199             | 23.633±0.098             |
| C17:0                              | 0.184±0.002              | 0.184±0.003              |
| C18:0                              | 22.231±0.078             | 22.283±0.034             |
| C20:0                              | 0.241±0.006              | 0.265±0.008              |
| C22:0                              | 0.233±0.013              | 0.251±0.010              |
| C24:0                              | 0.230±0.009              | 0.247±0.012              |
| <b>Monounsaturated fatty acids</b> |                          |                          |
| C16:1n-7**                         | 0.443±0.005              | 0.468±0.004              |
| C18:1n-7**                         | 3.322±0.032              | 3.448±0.023              |
| C20:1n-7**                         | 0.231±0.008              | 0.266±0.006              |
| C16:1n-9                           | 0.146±0.003              | 0.148±0.003              |
| C18:1n-9*                          | 15.538±0.129             | 16.037±0.121             |
| C20:1n-9*                          | 1.488±0.050              | 1.695±0.059              |
| C22:1n-9*                          | 0.206±0.008              | 0.228±0.002              |
| C24:1n-9                           | 0.359±0.027              | 0.366±0.015              |
| <b>Polyunsaturated fatty acids</b> |                          |                          |
| C20:5n-3                           | 0.085±0.005              | 0.081±0.004              |
| C22:5n-3                           | 0.171±0.008              | 0.179±0.010              |
| C22:6n-3*                          | 15.941±0.279             | 15.287±0.089             |
| C18:2n-6                           | 0.833±0.016              | 0.832±0.031              |

---

|           |              |              |
|-----------|--------------|--------------|
| C20:2n-6  | 0.167±0.002  | 0.182±0.009  |
| C20:3n-6  | 0.552±0.004  | 0.536±0.011  |
| C20:4n-6* | 10.431±0.052 | 10.190±0.086 |
| C22:4n-6  | 2.780±0.037  | 2.718±0.026  |
| C22:5n-6  | 0.230±0.004  | 0.242±0.007  |

---

Lipids were extracted from the cortex of mice inoculated with fecal microbiota of young mice (+ Microb YM) or old mice (+ Microb OM). The results correspond to quantification of fatty acid methyl esters (FAME) derivatives by GC-FID. The percentage of each fatty acid relative to that of total fatty acids (100%) was determined. Data are expressed as mean ± SEM. \* p < 0.05 and \*\* p < 0.01.

**Supplementary Table 3: Relative amounts of glycerophospholipid species in the cortex.**

|                                                          | + Microb YM (n=7) | + Microb OM (n=8) |
|----------------------------------------------------------|-------------------|-------------------|
| <b>Choline glycerophospholipids (nonhydrolyzed form)</b> |                   |                   |
| <i>Phosphatidylcholine (PC)</i>                          |                   |                   |
| PC (14:0/14:0)*                                          | 0.009±0.000       | 0.011±0.001       |
| PC (16:0/16:1)                                           | 9.679±0.155       | 10.165±0.143      |
| PC (16:0/16:0)                                           | 19.640±0.155      | 19.360±0.183      |
| PC (16:0/17:0)                                           | 0.381±0.007       | 0.368±0.006       |
| PC (16:1/18:3)                                           | 0.029±0.001       | 0.030±0.001       |
| PC (16:0/18:2)                                           | 1.999±0.034       | 2.102±0.069       |
| PC (16:0/18:1)*                                          | 22.486±0.080      | 22.115±0.165      |
| PC (18:0/16:0)                                           | 8.403±0.046       | 8.359±0.034       |
| PC (15:0/20:3)                                           | 0.006±0.000       | 0.006±0.001       |
| PC (16:1/20:4)                                           | 0.377±0.004       | 0.409±0.010       |
| PC (16:0/20:4)                                           | 5.036±0.029       | 4.852±0.091       |
| PC (24:3/12:0)                                           | 0.326±0.010       | 0.311±0.010       |
| PC (16:0/22:6)                                           | 4.391±0.041       | 4.435±0.047       |
| PC (18:1/20:4)                                           | 0.704±0.010       | 0.687±0.015       |
| PC (18:0/20:4)                                           | 4.333±0.028       | 4.211±0.051       |
| PC (20:4/20:4)                                           | 0.271±0.007       | 0.279±0.015       |
| PC (18:1/22:6)                                           | 0.487±0.008       | 0.487±0.004       |
| PC (18:0/22:6)                                           | 1.865±0.018       | 1.942±0.050       |
| PC (20:1/20:4)                                           | 0.124±0.007       | 0.107±0.006       |
| PC (20:0/20:4)                                           | 0.445±0.004       | 0.435±0.009       |

---

|                                  |              |              |
|----------------------------------|--------------|--------------|
| PC (20:1/22:6)                   | 0.040±0.003  | 0.047±0.003  |
| PC (20:0/22:5)                   | 0.035±0.001  | 0.036±0.001  |
| PC (21:0/21:0)*                  | 0.002±0.000  | 0.003±0.000  |
| <i>Plasmenylcholine (PlsC)</i>   |              |              |
| PlsC (18:2p/22:6)                | 0.471±0.010  | 0.510±0.022  |
| PlsC (18:0p/18:2)                | 0.041±0.001  | 0.045±0.001  |
| <i>Others</i>                    |              |              |
| PC (16:0e/18:2)                  | 0.034±0.001  | 0.039±0.003  |
| PC (16:1e/20:4)                  | 0.024±0.001  | 0.023±0.001  |
| PC (18:0e/18:2)                  | 0.204±0.008  | 0.235±0.013  |
| PC (16:1e/22:6)                  | 0.310±0.007  | 0.330±0.012  |
| <i>Undetermined</i>              |              |              |
| PC (15:0/17:2) / PC (18:1/14:1)  | 0.060±0.002  | 0.068±0.003  |
| PC (15:0/18:1) / PC (16:0e/18:1) | 1.470±0.017  | 1.520±0.019  |
| PC (16:0/18:3) / PC (16:1/18:2)* | 0.219±0.005  | 0.258±0.013  |
| PC (15:0/20:4) / PC (16:0e/20:4) |              |              |
| / PC (18:2p/18:1)                | 0.097±0.002  | 0.098±0.001  |
| PC (16:1/19:0) / PC (18:0e/18:1) | 0.390±0.010  | 0.404±0.010  |
| PC (18:1/18:1) / PC (18:0/18:2)  | 3.688±0.019  | 3.672±0.040  |
| PC (18:0/18:1) / PC (16:1p/22:6) | 10.542±0.050 | 10.530±0.063 |
| PC (18:0/19:0) / PC (16:1/22:6)  |              |              |
| / PC (18:3/20:4)*                | 0.205±0.004  | 0.223±0.006  |
| PC (16:0/22:1) / PC (18:1p/22:6) | 0.952±0.033  | 1.072±0.046  |
| PC (38:3)*                       | 0.212±0.002  | 0.202±0.003  |
| PC (42:6)                        | 0.007±0.000  | 0.007±0.000  |

---

|                                                               |              |              |
|---------------------------------------------------------------|--------------|--------------|
| PC (42:3)                                                     | 0.009±0.001  | 0.010±0.001  |
| <b>Lysophosphatidylcholine (LPC)</b>                          |              |              |
| LPC 16:0                                                      | 47.481±0.391 | 47.792±0.337 |
| LPC 18:0                                                      | 20.109±0.504 | 21.514±0.431 |
| LPC 18:1                                                      | 20.403±0.379 | 19.657±0.420 |
| LPC 18:2                                                      | 0.698±0.026  | 0.691±0.037  |
| LPC 20:1                                                      | 0.955±0.042  | 1.031±0.052  |
| LPC 20:2                                                      | 0.243±0.006  | 0.226±0.006  |
| LPC 20:4                                                      | 5.637±0.261  | 4.778±0.256  |
| LPC 22:6                                                      | 4.474±0.159  | 4.312±0.154  |
| <b>Ethanolamine glycerophospholipids (nonhydrolyzed form)</b> |              |              |
| <i>Phosphatidylethanolamine (PE)</i>                          |              |              |
| PE (16:0/16:1)                                                | 0.127±0.002  | 0.134±0.003  |
| PE (16:0/16:0)                                                | 0.199±0.006  | 0.197±0.005  |
| PE (16:0/18:2)*                                               | 0.28±0.003   | 0.301±0.007  |
| PE (16:0/18:1)                                                | 5.033±0.045  | 5.203±0.089  |
| PE (16:1/20:4)**                                              | 0.217±0.005  | 0.252±0.007  |
| PE (16:0/20:4)                                                | 1.745±0.016  | 1.701±0.022  |
| PE (18:1/18:2)                                                | 0.337±0.014  | 0.312±0.013  |
| PE (18:0/18:2)                                                | 3.476±0.044  | 3.689±0.088  |
| PE (18:0/18:1)                                                | 6.196±0.102  | 6.434±0.089  |
| PE (18:3/20:4)**                                              | 0.144±0.004  | 0.158±0.004  |
| PE (16:0/22:6)                                                | 6.925±0.064  | 6.716±0.093  |
| PE (18:1/20:4)                                                | 2.144±0.098  | 2.264±0.018  |
| PE (18:0/20:4)                                                | 13.752±0.113 | 13.150±0.240 |

---

|                                     |              |              |
|-------------------------------------|--------------|--------------|
| PE (20:1/18:2)                      | 0.529±0.012  | 0.504±0.008  |
| PE (20:0/18:2)*                     | 0.714±0.019  | 0.812±0.037  |
| PE (18:2/22:6)                      | 0.149±0.003  | 0.157±0.009  |
| PE (18:1/22:6)                      | 1.883±0.009  | 1.871±0.020  |
| PE (18:0/22:6)*                     | 20.398±0.143 | 19.765±0.132 |
| PE (18:0/22:4)                      | 5.437±0.056  | 5.340±0.080  |
| PE (16:1/24:2)                      | 0.055±0.005  | 0.057±0.002  |
| PE (18:0/22:1)                      | 0.091±0.004  | 0.108±0.006  |
| PE (20:1/22:6)                      | 0.083±0.001  | 0.087±0.003  |
| PE (20:0/22:6)**                    | 0.048±0.001  | 0.044±0.001  |
| PE (20:0/22:5)                      | 0.087±0.002  | 0.087±0.001  |
| PE (20:0/22:4)                      | 0.143±0.003  | 0.138±0.002  |
| PE (22:6/22:6)                      | 0.207±0.006  | 0.246±0.016  |
| PE (22:5/22:6)                      | 0.020±0.001  | 0.021±0.001  |
| PE (22:4/22:6)                      | 0.147±0.004  | 0.149±0.002  |
| PE (24:6/22:6)                      | 0.006±0.000  | 0.007±0.001  |
| PE (24:4/22:6)                      | 0.012±0.000  | 0.011±0.001  |
| <i>Plasmenylethanolamine (PlsE)</i> |              |              |
| PlsE (16:0p/16:1)                   | 0.021±0.001  | 0.021±0.001  |
| PlsE (16:0p/16:0)                   | 0.091±0.002  | 0.086±0.002  |
| PlsE (18:0p/14:0)                   | 0.003±0.000  | 0.003±0.000  |
| PlsE (16:0p/18:2)                   | 0.023±0.001  | 0.022±0.001  |
| PlsE (16:0p/18:1)                   | 1.454±0.038  | 1.617±0.056  |
| PlsE (18:0p/16:0)                   | 0.463±0.007  | 0.459±0.005  |
| PlsE (16:0p/20:4)                   | 1.111±0.025  | 1.098±0.024  |

---

---

|                     |             |             |
|---------------------|-------------|-------------|
| PlsE (16:0p/20:3)   | 0.070±0.001 | 0.075±0.002 |
| PlsE (18:1p/18:2)   | 0.030±0.001 | 0.030±0.002 |
| PlsE (18:0p/18:2)   | 0.042±0.002 | 0.044±0.002 |
| PlsE (18:1p/18:0)*  | 0.027±0.001 | 0.031±0.000 |
| PlsE (18:0p/18:1)   | 2.700±0.063 | 2.870±0.063 |
| PlsE (16:0p/20:0)** | 0.011±0.001 | 0.015±0.001 |
| PlsE (18:0p/18:0)   | 0.009±0.000 | 0.010±0.001 |
| PlsE (16:0p/22:6)   | 3.260±0.026 | 3.173±0.041 |
| PlsE (18:1p/20:4)   | 1.031±0.009 | 1.042±0.018 |
| PlsE (16:0p/22:4)   | 0.812±0.014 | 0.788±0.013 |
| PlsE (18:1p/20:3)   | 0.497±0.007 | 0.499±0.010 |
| PlsE (18:0p/20:4)   | 2.418±0.019 | 2.391±0.024 |
| PlsE (16:0p/22:3)   | 0.083±0.003 | 0.091±0.003 |
| PlsE (18:1p/20:2)   | 0.117±0.003 | 0.129±0.005 |
| PlsE (18:0p/20:3)   | 0.225±0.004 | 0.242±0.007 |
| PlsE (16:0p/22:2)   | 0.010±0.000 | 0.012±0.001 |
| PlsE (18:1p/20:1)*  | 1.492±0.044 | 1.678±0.056 |
| PlsE (18:0p/20:2)   | 0.095±0.002 | 0.102±0.004 |
| PlsE (16:0p/22:1)   | 0.024±0.001 | 0.027±0.001 |
| PlsE (18:1p/20:0)*  | 0.113±0.006 | 0.145±0.008 |
| PlsE (18:0p/20:1)   | 1.192±0.040 | 1.350±0.049 |
| PlsE (18:0p/20:0)*  | 0.038±0.003 | 0.050±0.004 |
| PlsE (18:1p/22:6)   | 1.251±0.010 | 1.238±0.015 |
| PlsE (18:0p/22:6)   | 4.846±0.051 | 4.713±0.041 |
| PlsE (18:1p/22:4)   | 0.888±0.021 | 0.931±0.020 |

---



|                                           |              |              |
|-------------------------------------------|--------------|--------------|
| PlsE (16:0p/24:4)                         | 0.037±0.001  | 0.035±0.001  |
| PlsE (18:1p/22:3)                         | 0.763±0.013  | 0.729±0.018  |
| PlsE (18:0p/22:4)                         | 1.666±0.023  | 1.644±0.027  |
| PlsE (18:1p/22:2)                         | 0.037±0.001  | 0.041±0.002  |
| PlsE (18:0p/22:3)                         | 0.093±0.003  | 0.105±0.004  |
| PlsE (18:1p/22:1)*                        | 0.122±0.006  | 0.145±0.005  |
| PlsE (18:0p/22:2)                         | 0.023±0.001  | 0.026±0.002  |
| PlsE (18:0p/22:1)**                       | 0.087±0.003  | 0.103±0.005  |
| PlsE (20:1p/22:6)                         | 0.030±0.001  | 0.030±0.001  |
| PlsE (20:0p/22:6)                         | 0.086±0.003  | 0.083±0.003  |
| <i>Undetermined</i>                       |              |              |
| PE (16:0/18:0) / PE (17:0/17:0)           | 0.670±0.013  | 0.667±0.012  |
| PE 36:0                                   | 0.045±0.003  | 0.043±0.003  |
| PE 38:1*                                  | 0.599±0.017  | 0.688±0.026  |
| PE 40:2 *                                 | 0.131±0.005  | 0.163±0.011  |
| PE 40:5                                   | 0.450±0.011  | 0.458±0.019  |
| PE 42:1*                                  | 0.035±0.003  | 0.049±0.004  |
| PE 42:2 **                                | 0.030±0.002  | 0.039±0.002  |
| PE 42:8                                   | 0.057±0.002  | 0.055±0.001  |
| <b>Lysophosphatidylethanolamine (LPE)</b> |              |              |
| LPE 18:0*                                 | 12.160±0.262 | 13.137±0.202 |
| LPE 18:1                                  | 20.907±0.638 | 22.261±0.681 |
| LPE 18:2                                  | 0.367±0.013  | 0.351±0.013  |
| LPE 20:4*                                 | 17.629±0.160 | 16.888±0.262 |
| LPE 22:6*                                 | 48.937±0.423 | 47.363±0.465 |

---

**Inositol glycerophospholipids (nonhydrolyzed form)***Phosphatidylinositol (PI)*

|                |              |              |
|----------------|--------------|--------------|
| PI (16:0/18:2) | 0.165±0.015  | 0.179±0.011  |
| PI (16:0/18:1) | 2.183±0.102  | 2.405±0.088  |
| PI (18:0/16:0) | 1.121±0.081  | 1.248±0.035  |
| PI (16:0/20:4) | 9.776±0.318  | 9.344±0.176  |
| PI (18:1/18:2) | 0.145±0.007  | 0.162±0.009  |
| PI (18:1/18:1) | 0.617±0.015  | 0.665±0.033  |
| PI (18:0/18:1) | 2.157±0.097  | 2.286±0.054  |
| PI (20:0/16:0) | 0.041±0.006  | 0.043±0.005  |
| PI (17:0/20:4) | 0.412±0.025  | 0.433±0.010  |
| PI (16:0/22:6) | 1.277±0.049  | 1.339±0.055  |
| PI (18:0/20:4) | 61.556±0.346 | 61.653±0.187 |
| PI (18:0/22:6) | 1.893±0.056  | 2.118±0.114  |

*Plasmenylinositol (PlsI)*

|                   |              |              |
|-------------------|--------------|--------------|
| PlsI (18:0p/20:4) | 11.215±0.226 | 10.270±0.409 |
|-------------------|--------------|--------------|

*Undetermined*

|                                 |             |             |
|---------------------------------|-------------|-------------|
| PI (18:0/20:5) / PI (18:1/20:4) | 7.443±0.054 | 7.855±0.159 |
|---------------------------------|-------------|-------------|

---

Lipids were extracted from the cortex of mice inoculated with gut microbiota of young mice (+ Microb YM) or old mice (+ Microb OM). Lipid species were analyzed by LC-MS<sup>2</sup>. For each glycerophospholipid class, results are expressed as abundance (in percentage) of each species relative to that of total species, defined as 100%. Data are expressed as mean ± SEM. \* p < 0.05 and \*\* p < 0.01.

**Supplementary Table 4: Relative levels of sphingomyelin species in the cortex.**

| <b>Sphingomyelin species</b>      | <b>+ Microb YM (n=7)</b> | <b>+ Microb OM (n=8)</b> |
|-----------------------------------|--------------------------|--------------------------|
| SM (d18:1/16:0)                   | 6.373±0.240              | 6.596±0.327              |
| SM (d16:1/17:0)                   | 0.053±0.003              | 0.057±0.004              |
| SM (d18:1/16:1)                   | 0.158±0.007              | 0.175±0.010              |
| SM (d18:0/16:0) *                 | 0.906±0.017              | 1.005±0.026              |
| SM (d18:1/17:0) *                 | 1.006±0.018              | 0.946±0.017              |
| SM (d18:2/18:0)                   | 20.140±0.418             | 19.686±0.573             |
| SM (d18:1/18:0)*                  | 50.830±0.485             | 49.248±0.674             |
| SM (d18:0/18:0)                   | 0.714±0.045              | 0.624±0.030              |
| SM (d18:2/20:0)                   | 0.154±0.006              | 0.163±0.004              |
| SM (d18:2/22:0)                   | 0.485±0.011              | 0.524±0.018              |
| SM (d18:1/22:0)                   | 2.247±0.066              | 2.491±0.147              |
| SM (d18:2/24:1)                   | 0.339±0.014              | 0.360±0.015              |
| SM (d18:1/24:1) *                 | 8.709±0.242              | 9.894±0.425              |
| SM (d18:1/24:0)                   | 1.751±0.055              | 2.025±0.121              |
| <i>Undetermined</i>               |                          |                          |
| SM (d18:1/20:0) / SM (d20:0/18:1) | 6.135±0.153              | 6.207±0.149              |

Lipids were extracted from the cortex of mice inoculated with gut microbiota of young mice (+ Microb YM) or old mice (+ Microb OM). Sphingomyelin species were analyzed by LC-MS<sup>2</sup>. Results are expressed as abundance (in percentage) of each species relative to that of total species, defined as 100%. Data are expressed as mean ± SEM. \* p < 0.05.
